# Supplementary material for: Central hepatectomy versus major hepatectomy for patients with centrally located hepatocellular carcinoma: a systematic review and meta-analysis
Source: PubMed Central journal article supplement (PMC9814185; doi:10.1186/s12893-022-01891-7), 2023-01-05
Supplement: 12893_2022_1891_MOESM6_ESM.pdf [file 12893_2022_1891_MOESM6_ESM.pdf]

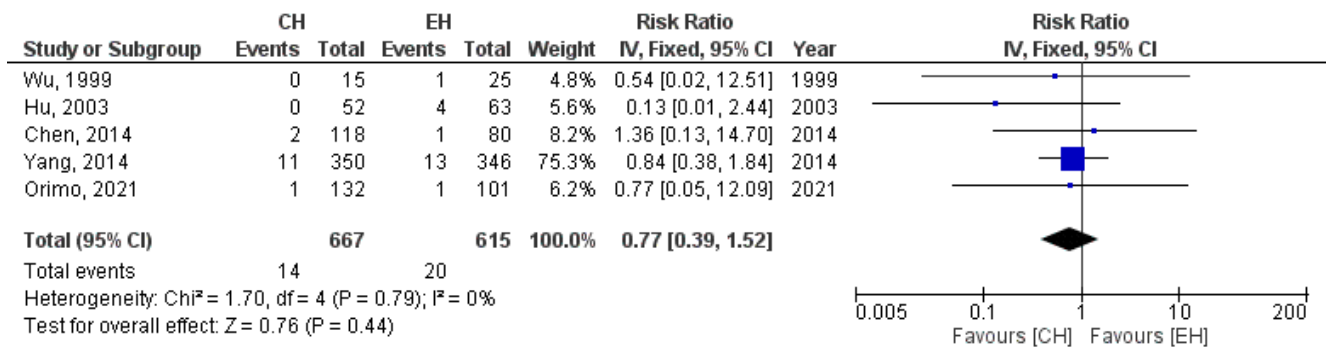

supplementary figure 6: Wound infection for CH and EH
